# Supplementary material for: A Sublethal Concentration of Sulfoxaflor Has Minimal Impact on Buff-Tailed Bumblebee (Bombus terrestris) Locomotor Behaviour under Aversive Conditioning
Source: MDPI journal article supplement (doi:10.3390/toxics11030279), 2023-03-18
Supplement: s1 [file s1]

**Supplementary Table S1A: Raw speed curvature power law exponents for individual bees in the low dose insecticide experiments (post-training), calculated from bee tracking data. (Control;  $n = 9$ , Sulfoxaflor;  $n = 9$ , Thiacloprid;  $n = 9$ , Thiamethoxam;  $n = 9$ ).**

| Control | Sulfoxaflor | Thiacloprid | Thiamethoxam |
|---------|-------------|-------------|--------------|
| 0.58    | 0.57        | 0.56        | 0.58         |
| 0.57    | 0.48        | 0.49        | 0.74         |
| 0.52    | 0.55        | 0.4         | 0.62         |
| 0.5     | 0.5         | 0.45        | 0.57         |
| 0.38    | 0.53        | 0.49        | 0.64         |
| 0.43    | 0.36        | 0.5         | 0.45         |
| 0.63    | 0.5         | 0.5         | 0.5          |
| 0.4     | 0.42        | 0.48        | 0.61         |
| 0.56    | 0.52        | 0.5         | 0.59         |

**Supplementary Table S1B: Raw speed curvature power law exponents for individual bees in the high dose insecticide experiments (post training), calculated from bee tracking data. Control T1;  $n = 9$ , Control T10;  $n = 9$ , Sulfoxaflor;  $n=9$ .**

| <b>Control<br/>(T1)</b> | <b>Control<br/>(T10)</b> | <b>Sulfoxaflor</b> |
|-------------------------|--------------------------|--------------------|
| 0.54                    | 0.4                      | 0.47               |
| 0.51                    | 0.51                     | 0.49               |
| 0.59                    | 0.42                     | 0.51               |
| 0.59                    | 0.47                     | 0.47               |
| 0.58                    | 0.4                      | 0.36               |
| 0.57                    | 0.36                     | 0.46               |
| 0.5                     | 0.37                     | 0.48               |
| 0.42                    | 0.55                     | 0.39               |
| 0.43                    | 0.52                     | 0.36               |

**Supplementary Table S2A: Total food consumption per bee in the low dose treatments over the course of the full five days of the experiment. Evaporation is taken into account in the calculations. Insecticide dosage consumed per bee (ng) calculated.**

| <b>Evaporation feeders (g)</b>                        | <b>Control solution consumption (g)</b> | <b>Control - evaporation (g)</b> |
|-------------------------------------------------------|-----------------------------------------|----------------------------------|
| 0.0213                                                | 0.5292                                  | 0.506866667                      |
| 0.0308                                                | 0.871                                   | 0.848666667                      |
| 0.0149                                                | 1.2303                                  | 1.207966667                      |
|                                                       | 2.3411                                  | 2.318766667                      |
|                                                       | 0.8505                                  | 0.828166667                      |
| Average evaporation (g):                              | 1.1087                                  | 1.086366667                      |
| 0.022333333                                           | 1.3813                                  | 1.358966667                      |
|                                                       | 1.6002                                  | 1.577866667                      |
|                                                       | 1.4223                                  | 1.399966667                      |
| <b>Thiacloprid solution consumption (500 ppb) (g)</b> | <b>Thiacloprid - evaporation (g)</b>    | <b>Thiacloprid consumed (ng)</b> |
| 0.4285                                                | 0.406166667                             | 156.2179487                      |
| 0.7849                                                | 0.762566667                             | 293.2948719                      |
| 2.5935                                                | 2.571166667                             | 988.9102565                      |
| 2.0486                                                | 2.026266667                             | 779.3333335                      |
| 1.5811                                                | 1.558766667                             | 599.5256412                      |
| 0.1671                                                | 0.144766667                             | 55.67948731                      |
| 1.7003                                                | 1.677966667                             | 645.371795                       |
| 1.8261                                                | 1.803766667                             | 693.7564104                      |
| 0.6984                                                | 0.676066667                             | 260.0256412                      |
| <b>Sulfoxaflor solution consumption (5ppb) (g)</b>    | <b>Sulfoxaflor - evaporation (g)</b>    | <b>Sulfoxaflor consumed (ng)</b> |
| 1.8727                                                | 1.850366667                             | 7.116794873                      |
| 0.2587                                                | 0.236366667                             | 0.909102565                      |
| 0.3447                                                | 0.322366667                             | 1.239871796                      |
| 0.2441                                                | 0.221766667                             | 0.852948719                      |

|                                                          |                                           |                                       |
|----------------------------------------------------------|-------------------------------------------|---------------------------------------|
| 0.9514                                                   | 0.929066667                               | 3.573333335                           |
| 0.6664                                                   | 0.644066667                               | 2.477179488                           |
| 1.6421                                                   | 1.619766667                               | 6.229871796                           |
| 1.1803                                                   | 1.157966667                               | 4.45371795                            |
| 1.5689                                                   | 1.546566667                               | 5.948333335                           |
| <b>Thiamethoxam solution<br/>consumption (10ppb) (g)</b> | <b>Thiamethoxam -<br/>evaporation (g)</b> | <b>Thiamethoxam consumed<br/>(ng)</b> |
| 2.0728                                                   | 2.050466667                               | 15.77282052                           |
| 1.1128                                                   | 1.090466667                               | 8.388205131                           |
| 1.5311                                                   | 1.508766667                               | 11.60589744                           |
| 1.0132                                                   | 0.990866667                               | 7.622051285                           |
| 2.0031                                                   | 1.980766667                               | 15.23666667                           |
| 0.4304                                                   | 0.408066667                               | 3.138974362                           |
| 0.967                                                    | 0.944666667                               | 7.266666669                           |
| 1.4318                                                   | 1.409466667                               | 10.84205128                           |
| 1.2923                                                   | 1.269966667                               | 9.768974362                           |

**Supplementary Table S2B: Total food consumption per bee in the high dose treatments over the course of the full five days of the experiment**

| <b>Control solution consumption (g)</b> | <b>Control - evaporation (g)</b>     |                                  |
|-----------------------------------------|--------------------------------------|----------------------------------|
| 1.5433                                  | 1.520966667                          |                                  |
| 2.4051                                  | 2.382766667                          |                                  |
| 1.6933                                  | 1.670966667                          |                                  |
| 2.0987                                  | 2.076366667                          |                                  |
| 2.3487                                  | 2.326366667                          |                                  |
| 1.2267                                  | 1.204366667                          |                                  |
| 1.4829                                  | 1.460566667                          |                                  |
| 1.6991                                  | 1.676766667                          |                                  |
| 1.4758                                  | 1.453466667                          |                                  |
| <b>Sulfoxaflor solution (50ppb) (g)</b> | <b>Sulfoxaflor - evaporation (g)</b> | <b>Sulfoxaflor consumed (ng)</b> |
| 1.6498                                  | 1.627466667                          | 62.59487181                      |
| 2.5661                                  | 2.543766667                          | 97.8371795                       |
| 1.0842                                  | 1.061866667                          | 40.84102565                      |
| 1.3657                                  | 1.343366667                          | 51.66794873                      |
| 0.4603                                  | 0.437966667                          | 16.84487181                      |
| 1.8664                                  | 1.844066667                          | 70.92564104                      |
| 0.7626                                  | 0.740266667                          | 28.47179488                      |
| 1.2966                                  | 1.274266667                          | 49.01025642                      |
| 0.8758                                  | 0.853466667                          | 32.82564104                      |
